# Supplementary material for: Development of a fully automatic separation system coupled with online ICP-MS for measuring rare earth elements in seawater
Source: Royal Society of Chemistry journal article supplement (doi:10.1039/d2ra02833f), 2022-01-01
Supplement: d2ra02833f1.pdf [file d2ra02833f1.pdf]

*Supporting Information*

**Development of a fully automatic separation system  
coupled with online ICP-MS for measuring rare earth  
elements in seawater**

Haitao Li,<sup>a</sup> Rui Tong,<sup>a</sup> Wei Guo,<sup>\*a</sup> Quanhui Xu,<sup>b</sup> Danyang Tao,<sup>c</sup> Yang Lai,<sup>a</sup> Lanlan Jin<sup>a</sup>, and Shenghong

Hu<sup>a</sup>

<sup>a</sup> State Key Laboratory of Biogeology and Environmental Geology, School of Earth Sciences, China  
University of Geosciences, Wuhan 430074, China

<sup>b</sup> Guangzhou Prin-Cen Scientific Ltd, Guangzhou 510730, China

<sup>c</sup> State Key Laboratory of Marine Pollution (SKLMP), Department of Chemistry, City University of Hong  
Kong, Hong Kong, China

\*Corresponding author: Wei Guo (wei.guo@cug.edu.cn), Tel: +86-027-67883452; +86-027-67883407

## Section. Calibration methods

A NexION™ 350D ICP-MS (PerkinElmer, USA) was used for the determination of REEs in this study. For this study, the standard mode of the ICP-MS was used for the determination of  $^{139}\text{La}$ ,  $^{140}\text{Ce}$ ,  $^{141}\text{Pr}$ ,  $^{146}\text{Nd}$ ,  $^{147}\text{Sm}$ ,  $^{153}\text{Eu}$ ,  $^{157}\text{Gd}$ ,  $^{159}\text{Tb}$ ,  $^{163}\text{Dy}$ ,  $^{165}\text{Ho}$ ,  $^{166}\text{Er}$ ,  $^{169}\text{Tm}$ ,  $^{172}\text{Yb}$  and  $^{175}\text{Lu}$ . Calibration curves were constructed using mixed REE standard solutions (0.5, 1, 2, 5, 10 and 20 ng L<sup>-1</sup>) and linear correlation coefficients ( $R^2 > 0.999$ ) were calculated for all REEs. The accuracy (the relative standard deviation, RSD) of La, Ce, Pr, Nd, Sm, Eu, Gd, Tb, Dy, Ho, Er, Tm, Yb and Lu elements are 0.17%, 0.09%, 0.16%, 0.11%, 0.36%, 0.37%, 0.52%, 0.91%, 0.03%, 0.29%, 0.41%, 1.39%, 0.64% and 1.06%, respectively. The eluent with the target elements was injected into the spray chamber of the ICP-MS through a concentric glass nebulizer and quartz ball joint injector. Rhodium (Rh) was added to all samples and standards at a concentration of 100 µg L<sup>-1</sup> to check the elution proceeded properly.

**Fig. S1** Effect of the sample injection volume on the signal intensity (A), the ratio of signal to background (B), and the relative standard deviation (C). A mixed REEs standard solution ( $10 \text{ ng L}^{-1}$  for each element) was used in this experiment.

**Fig. S2** Sampling sites from the Pearl River Estuary (Guangdong, China) between 9<sup>th</sup> to 11<sup>th</sup> July, 2021.

**Table S1** The salt (%), pH value, and conductivity of 18 collected water samples

**Table S2** REEs concentrations of river and seawater samples ( $\text{ng L}^{-1}$ )

**Table S3** REEs patten (PAAS Normalized values) and  $\text{Gd}_N/\text{Gd}_N^*$  of river and seawater samples

**Fig. S3** Scatter diagrams of salt (A) and PH (B) vs  $\sum\text{REE}$  diagram for all seawaters.

**Table S4** Comparison of the ELSPE-2 Precon system, SeaFASTTM system and CETAC DSX-100 system

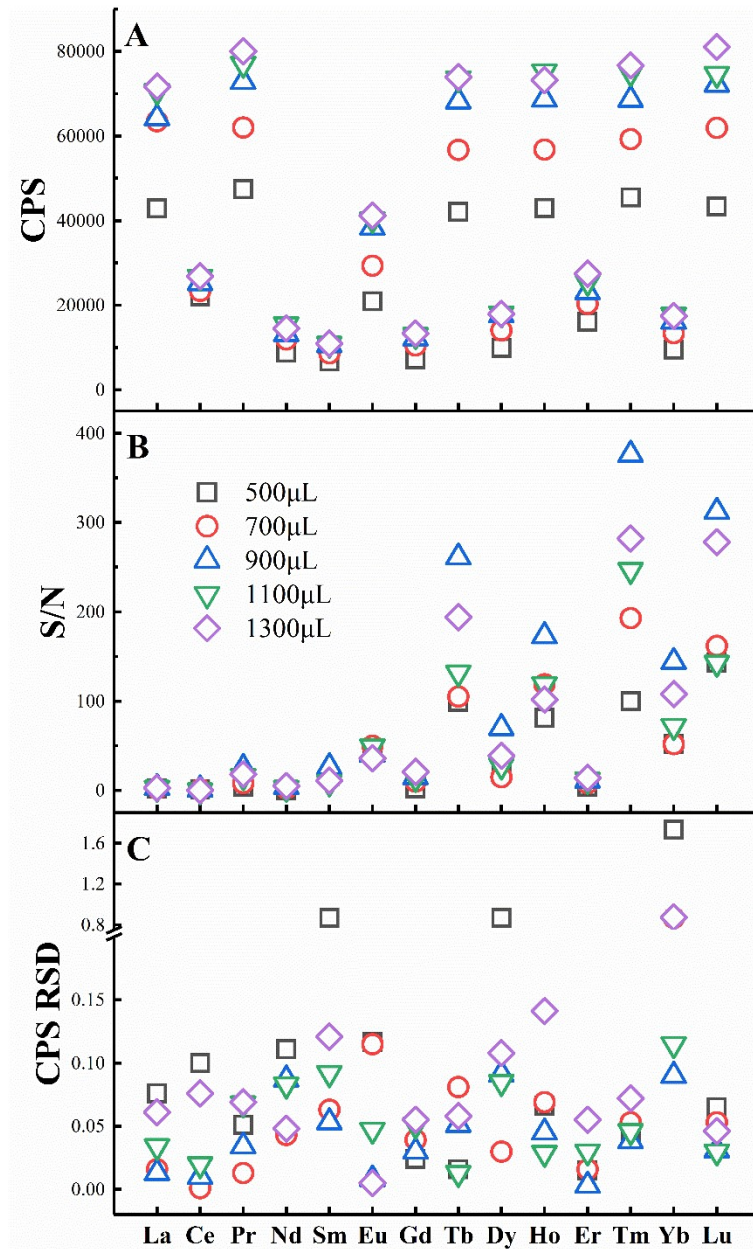

**Fig. S1** Effect of the sample injection volume on the signal intensity (A), the ratio of signal to background (B), and the relative standard deviation (n=3) (C). A mixed REEs standard solution (10 ng L<sup>-1</sup> for each element) was used in this experiment.

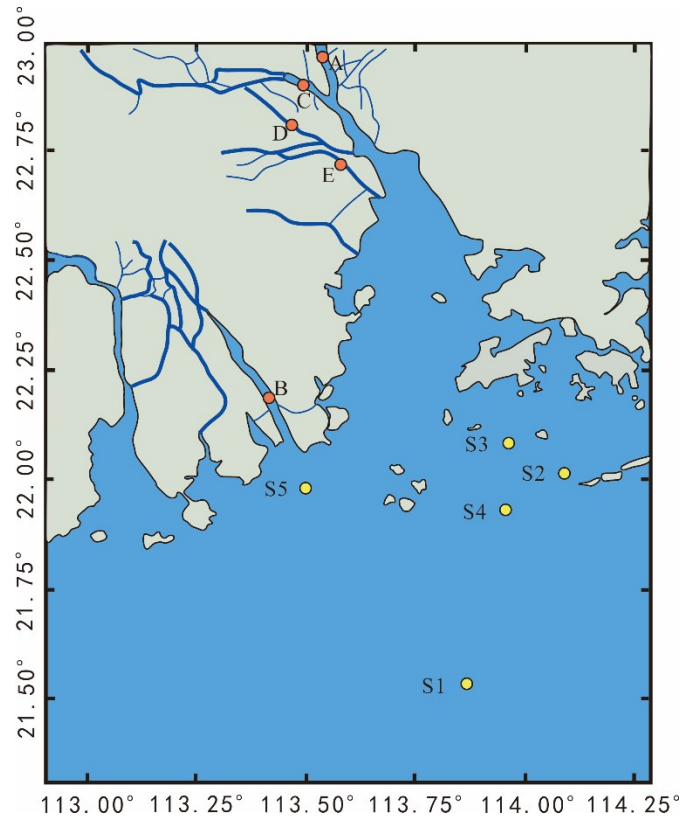

**Fig. S2** Sampling sites from the Pearl River Estuary (Guangdong, China) between 9<sup>th</sup> to 11<sup>th</sup> July, 2021.

**Table S1** The salt (%), pH value, and conductivity of 18 collected water samples

| <b>Sample</b> | <b>Descriptions</b>   | <b>Salt (%)</b> | <b>pH value</b> | <b>Conductivity (ms/cm)</b> |
|---------------|-----------------------|-----------------|-----------------|-----------------------------|
| S1 SS         | Surface seawater      | 3.21            | 8.16            | 52.4                        |
| S1 IW         | Intermediate seawater | 3.26            | 8.11            | 52.5                        |
| S1 BS         | Bottom seawater       | 3.30            | 7.96            | 53.1                        |
| S2 SS         | Surface seawater      | 2.91            | 7.93            | 47.5                        |
| S2 IW         | Intermediate seawater | 3.20            | 8.02            | 52.7                        |
| S2 BS         | Bottom seawater       | 3.19            | 7.91            | 52.5                        |
| S3 SS         | Surface seawater      | 2.50            | 8.02            | 42.0                        |
| S3 IW         | Intermediate seawater | 3.01            | 7.89            | 49.6                        |
| S3 BS         | Bottom seawater       | 0.85            | 7.74            | 19.0                        |
| S4 SS         | Surface seawater      | 2.59            | 8.26            | 44.5                        |
| S4 IW         | Intermediate seawater | 3.20            | 7.96            | 52.8                        |
| S4 BS         | Bottom seawater       | 3.19            | 7.88            | 52.5                        |
| S5 SS         | Surface seawater      | 1.03            | 7.60            | 21.8                        |
| A RW          | River water           | <0.2            | 8.01            | 6.2                         |
| B RW          | River water           | <0.2            | 7.84            | 0.8                         |
| C RW          | River water           | <0.2            | 7.73            | 0.8                         |
| D RW          | River water           | <0.2            | 8.10            | 0.3                         |
| E RW          | River water           | <0.2            | 7.86            | 0.3                         |

**Table S2** REEs concentrations of river and seawater samples (ng L<sup>-1</sup>)

| REEs | A RW | B RW | C RW | D RW  | E RW | S1 SS | S1 IW | S1 BS | S2 SS | S2 IW | S2 BS | S3 SS | S3 IW | S3 BS | S4 SS | S4 IW | S4 BS | S5 SS |
|------|------|------|------|-------|------|-------|-------|-------|-------|-------|-------|-------|-------|-------|-------|-------|-------|-------|
| La   | 3.29 | 3.17 | 2.30 | 14.33 | 8.57 | 5.28  | 4.58  | 1.22  | 0.48  | 2.45  | 1.38  | 0.31  | 0.92  | 1.48  | 7.44  | 6.38  | 5.03  | 4.94  |
| Ce   | 1.32 | 1.63 | 2.01 | 12.79 | 6.26 | 3.99  | 4.00  | 2.61  | 0.88  | 3.25  | 1.87  | 0.06  | 0.36  | 2.21  | 5.45  | 4.20  | 3.20  | 4.61  |
| Pr   | 0.82 | 1.20 | 1.25 | 3.59  | 2.25 | 1.37  | 1.30  | 0.69  | 0.55  | 1.16  | 0.87  | 0.23  | 0.06  | 1.04  | 2.30  | 2.06  | 1.21  | 2.39  |
| Nd   | 3.11 | 4.16 | 3.36 | 14.47 | 8.84 | 3.21  | 5.87  | 3.22  | 3.27  | 4.99  | 3.88  | 0.97  | 0.76  | 4.57  | 9.01  | 7.14  | 5.02  | 9.35  |
| Sm   | 0.88 | 0.93 | 1.96 | 3.69  | 2.41 | 1.11  | 1.30  | 1.63  | 1.62  | 2.29  | 0.88  | 0.99  | 0.41  | 0.87  | 2.94  | 2.26  | 1.74  | 1.93  |
| Eu   | 0.65 | 0.67 | 1.41 | 0.95  | 0.69 | 0.36  | 0.41  | 0.33  | 0.34  | 0.30  | 0.43  | 0.57  | 0.25  | 0.22  | 0.64  | 0.77  | 0.61  | 0.77  |
| Gd   | 7.77 | 2.76 | 2.61 | 6.14  | 3.43 | 2.22  | 2.67  | 1.34  | 2.94  | 2.21  | 1.25  | 2.07  | 1.77  | 2.11  | 3.53  | 3.03  | 1.56  | 3.12  |
| Tb   | 0.21 | 0.22 | 0.71 | 0.72  | 0.38 | 0.26  | 0.41  | 0.21  | 0.25  | 0.31  | 0.36  | 0.77  | 0.42  | 0.35  | 0.63  | 0.92  | 0.70  | 0.62  |
| Dy   | 1.24 | 1.03 | 1.92 | 4.36  | 2.29 | 1.97  | 2.32  | 1.38  | 3.03  | 2.03  | 2.21  | 3.06  | 3.03  | 2.86  | 4.03  | 2.70  | 2.57  | 2.75  |
| Ho   | 0.46 | 0.47 | 0.73 | 0.64  | 0.55 | 0.66  | 0.54  | 0.41  | 0.87  | 0.51  | 0.51  | 1.31  | 0.88  | 0.84  | 0.90  | 1.14  | 0.91  | 0.96  |
| Er   | 3.05 | 1.86 | 2.36 | 4.43  | 2.95 | 1.71  | 2.93  | 1.04  | 2.70  | 2.23  | 1.55  | 3.06  | 2.99  | 4.31  | 3.92  | 3.67  | 2.10  | 2.95  |
| Tm   | 0.79 | 0.35 | 1.09 | 0.67  | 0.41 | 0.24  | 0.23  | 0.19  | 0.42  | 0.31  | 0.33  | 0.65  | 0.36  | 0.33  | 0.45  | 0.79  | 0.51  | 0.64  |
| Yb   | 6.84 | 3.35 | 2.77 | 4.05  | 2.84 | 1.96  | 1.85  | 1.05  | 2.16  | 1.90  | 1.48  | 3.50  | 2.32  | 2.67  | 3.44  | 2.80  | 2.33  | 2.73  |
| Lu   | 1.36 | 0.51 | 1.41 | 0.79  | 0.51 | 0.24  | 0.27  | 0.08  | 0.31  | 0.23  | 0.20  | 0.67  | 0.44  | 0.33  | 0.34  | 0.51  | 0.42  | 0.60  |
| ∑REE | 31.8 | 22.3 | 25.9 | 71.6  | 42.4 | 24.6  | 28.7  | 15.4  | 19.8  | 24.2  | 17.2  | 18.2  | 15.0  | 24.2  | 45.   | 38.4  | 27.9  | 38.4  |

RW: River Water;

SS: Surface seawater;

IW: Intermediate seawater;

BS: Bottom seawater;

∑REE= Total REE concentrations

**Table S3** REEs patten (PAAS Normalized values) and  $Gd_N/Gd_N^*$  of river and seawater Samples

| REEs                                 | A<br>RW | B<br>RW | C<br>RW | D<br>RW | E<br>RW | S1<br>SS | S1<br>IW | S1<br>BS | S2<br>SS | S2<br>IW | S2<br>BS | S3<br>SS | S3<br>IW | S3<br>BS | S4<br>SS | S4<br>IW | S4<br>BS | S5<br>SS |
|--------------------------------------|---------|---------|---------|---------|---------|----------|----------|----------|----------|----------|----------|----------|----------|----------|----------|----------|----------|----------|
| La                                   | 0.07    | 0.07    | 0.05    | 0.32    | 0.19    | 0.12     | 0.10     | 0.03     | 0.01     | 0.05     | 0.03     | 0.01     | 0.02     | 0.03     | 0.17     | 0.14     | 0.11     | 0.11     |
| Ce                                   | 0.01    | 0.02    | 0.02    | 0.14    | 0.07    | 0.05     | 0.05     | 0.03     | 0.01     | 0.04     | 0.02     | 0.00     | 0.00     | 0.03     | 0.06     | 0.05     | 0.04     | 0.05     |
| Pr                                   | 0.08    | 0.12    | 0.12    | 0.35    | 0.22    | 0.14     | 0.13     | 0.07     | 0.05     | 0.11     | 0.09     | 0.02     | 0.01     | 0.10     | 0.23     | 0.20     | 0.12     | 0.24     |
| Nd                                   | 0.08    | 0.11    | 0.09    | 0.39    | 0.24    | 0.09     | 0.16     | 0.09     | 0.09     | 0.13     | 0.10     | 0.03     | 0.02     | 0.12     | 0.24     | 0.19     | 0.13     | 0.25     |
| Sm                                   | 0.13    | 0.13    | 0.28    | 0.54    | 0.35    | 0.16     | 0.19     | 0.24     | 0.24     | 0.33     | 0.13     | 0.14     | 0.06     | 0.13     | 0.43     | 0.33     | 0.25     | 0.28     |
| Eu                                   | 0.54    | 0.55    | 1.16    | 0.79    | 0.56    | 0.29     | 0.34     | 0.28     | 0.28     | 0.25     | 0.35     | 0.47     | 0.20     | 0.18     | 0.53     | 0.63     | 0.50     | 0.64     |
| Gd                                   | 1.29    | 0.46    | 0.43    | 1.02    | 0.57    | 0.37     | 0.44     | 0.22     | 0.49     | 0.37     | 0.21     | 0.34     | 0.29     | 0.35     | 0.58     | 0.50     | 0.26     | 0.52     |
| Tb                                   | 0.24    | 0.25    | 0.80    | 0.81    | 0.42    | 0.29     | 0.46     | 0.24     | 0.28     | 0.34     | 0.40     | 0.87     | 0.47     | 0.39     | 0.71     | 1.03     | 0.78     | 0.70     |
| Dy                                   | 0.23    | 0.19    | 0.36    | 0.82    | 0.43    | 0.37     | 0.44     | 0.26     | 0.57     | 0.38     | 0.41     | 0.58     | 0.57     | 0.54     | 0.76     | 0.51     | 0.48     | 0.52     |
| Ho                                   | 0.44    | 0.44    | 0.69    | 0.61    | 0.52    | 0.63     | 0.51     | 0.39     | 0.82     | 0.48     | 0.49     | 1.24     | 0.84     | 0.80     | 0.86     | 1.09     | 0.87     | 0.91     |
| Er                                   | 0.99    | 0.60    | 0.77    | 1.44    | 0.96    | 0.56     | 0.95     | 0.34     | 0.88     | 0.72     | 0.50     | 1.00     | 0.97     | 1.40     | 1.27     | 1.19     | 0.68     | 0.96     |
| Tm                                   | 1.75    | 0.78    | 2.41    | 1.48    | 0.91    | 0.52     | 0.50     | 0.43     | 0.94     | 0.70     | 0.74     | 1.44     | 0.80     | 0.73     | 0.99     | 1.75     | 1.13     | 1.43     |
| Yb                                   | 2.27    | 1.11    | 0.92    | 1.35    | 0.94    | 0.65     | 0.61     | 0.35     | 0.72     | 0.63     | 0.49     | 1.16     | 0.77     | 0.89     | 1.14     | 0.93     | 0.78     | 0.91     |
| Lu                                   | 3.10    | 1.16    | 3.22    | 1.81    | 1.17    | 0.55     | 0.61     | 0.17     | 0.70     | 0.53     | 0.47     | 1.52     | 1.00     | 0.76     | 0.78     | 1.17     | 0.96     | 1.36     |
| LREE <sub>N</sub> /MREE <sub>N</sub> | 0.40    | 0.52    | 0.18    | 0.49    | 0.54    | 0.41     | 0.36     | 0.25     | 0.14     | 0.29     | 0.23     | 0.03     | 0.04     | 0.24     | 0.34     | 0.29     | 0.24     | 0.40     |
| HREE <sub>N</sub> /MREE <sub>N</sub> | 11.9    | 5.31    | 4.54    | 2.14    | 2.52    | 2.09     | 1.60     | 1.29     | 2.18     | 1.75     | 1.80     | 2.60     | 2.34     | 2.25     | 1.54     | 2.06     | 1.89     | 2.47     |
| $Gd_N/Gd_N^*$                        | 6.44    | 2.17    | 0.69    | 1.41    | 1.42    | 1.48     | 1.20     | 0.93     | 1.85     | 1.08     | 0.67     | 0.54     | 0.88     | 1.15     | 0.95     | 0.63     | 0.42     | 0.92     |

RW: River Water; SS: Surface seawater; IW: Intermediate seawater; BS: Bottom seawater.

$LREE_N = La_N + Pr_N + Nd_N$ ;  $MREE_N = Sm_N + Tb_N + Dy_N$ ;  $HREE_N = Tm_N + Yb_N + Lu_N$ ;

$Gd_N/Gd_N^* = Gd_N / (0.33 Sm_N + 0.67 Tb_N)$ ;

where the subscript N denotes normalization to PAAS and the superscript \* represents the geogenic background.





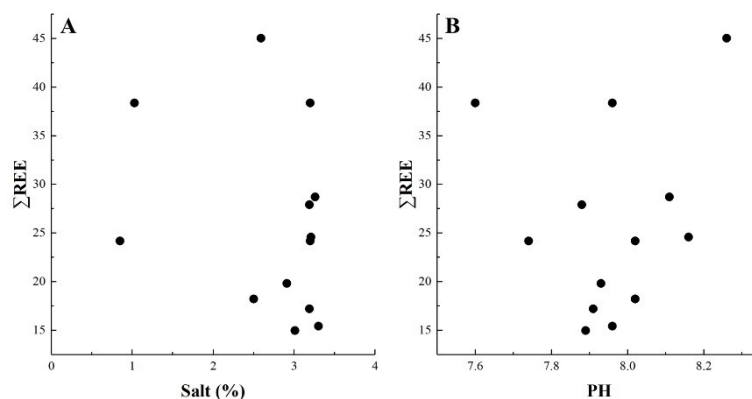

**Fig. S3** Scatter diagrams of salt (A) and PH (B) vs  $\Sigma$ REE diagram for all seawaters.

**Table S4** Comparison of the ELSPE-2 Precon system, SeaFAST™ system and CETAC DSX-100 system

|                                 | ELSPE-2 Precon system | SeaFAST™ system                                    | CETAC DSX-100 system |
|---------------------------------|-----------------------|----------------------------------------------------|----------------------|
| Particle size ( $\mu\text{m}$ ) | 5 $\mu\text{m}$       | 75 $\mu\text{m}$                                   | 0.2 $\mu\text{m}$    |
| Analysis efficiency             | ~ 4 min/sample        | ~ 9 min/sample (Inline)/ ~ 15 min/sample (Offline) | 1 h/sample           |
| Sample consumption              | < 1 mL                | 7~11 mL                                            | 120 mL               |
| Volume                          | 0.5*0.5*0.4 m         | 1.5*1*0.6 m                                        | --                   |
| Cost                            | < \$ 50 000           | > \$ 100 000                                       | --                   |

“--” means no data; The data about SeaFAST™ system are obtained from the website (<https://www.icpms.com/products/sea-fast.php>) and the literatures (Hathorne et al., 2012; Behrens et al., 2016); The data about CETAC DSX-100 system are come from the literature (Kühn et al., 2000).

### References

Hathorne E C, Haley B, Stichel T, et al. Online preconcentration ICP-MS analysis of rare earth elements in seawater[J]. *Geochemistry, Geophysics, Geosystems*, 2012, 13(1).

Behrens M K, Muratli J, Pradoux C, et al. Rapid and precise analysis of rare earth elements in small volumes of seawater-Method and intercomparison[J]. *Marine Chemistry*, 2016, 186: 110-120.

Kühn M, Kriews M. Improved detection of transition and rare earth elements in marine samples with

the CETAC DSX-100 preconcentration/matrix elimination system and ICP-MS[J]. Fresenius'

journal of analytical chemistry, 2000, 367(5): 440-444.
